# Supplementary material for: Specific depletion of resident microglia in the early stage of stroke reduces cerebral ischemic damage
Source: PubMed Central journal article supplement (PMC7986495; doi:10.1186/s12974-021-02127-w), 2021-03-23

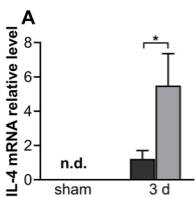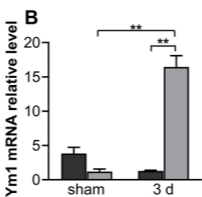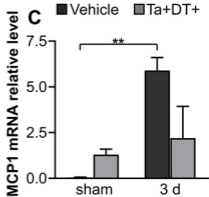

Supplement: 12974_2021_2127_MOESM2_ESM.pdf [file 12974_2021_2127_MOESM2_ESM.pdf]
